# Supplementary material
Source: MDPI journal article supplement (https://www.mdpi.com/2071-1050/13/4/1971)
Supplement: s1 [file s1]

Archive with 7 entries (5 files):
- Supplementary Materials/Supplementary materials report/
- Supplementary Materials/Supplementary materials report/T5.1 Final.pdf
- Supplementary Materials/Supplementary materials report/T5.1 Final_merged.docx
- Supplementary Materials/Sustainability_figures/
- Supplementary Materials/Sustainability_figures/GreentoGrey-01.png
- Supplementary Materials/Sustainability_figures/NBS_Lifecycle_White_Background-01.png
- Supplementary Materials/Sustainability_figures/Typology_t1-01-01.png
