# Supplementary material
Source: MDPI journal article supplement (https://www.mdpi.com/2071-1050/13/4/1971)

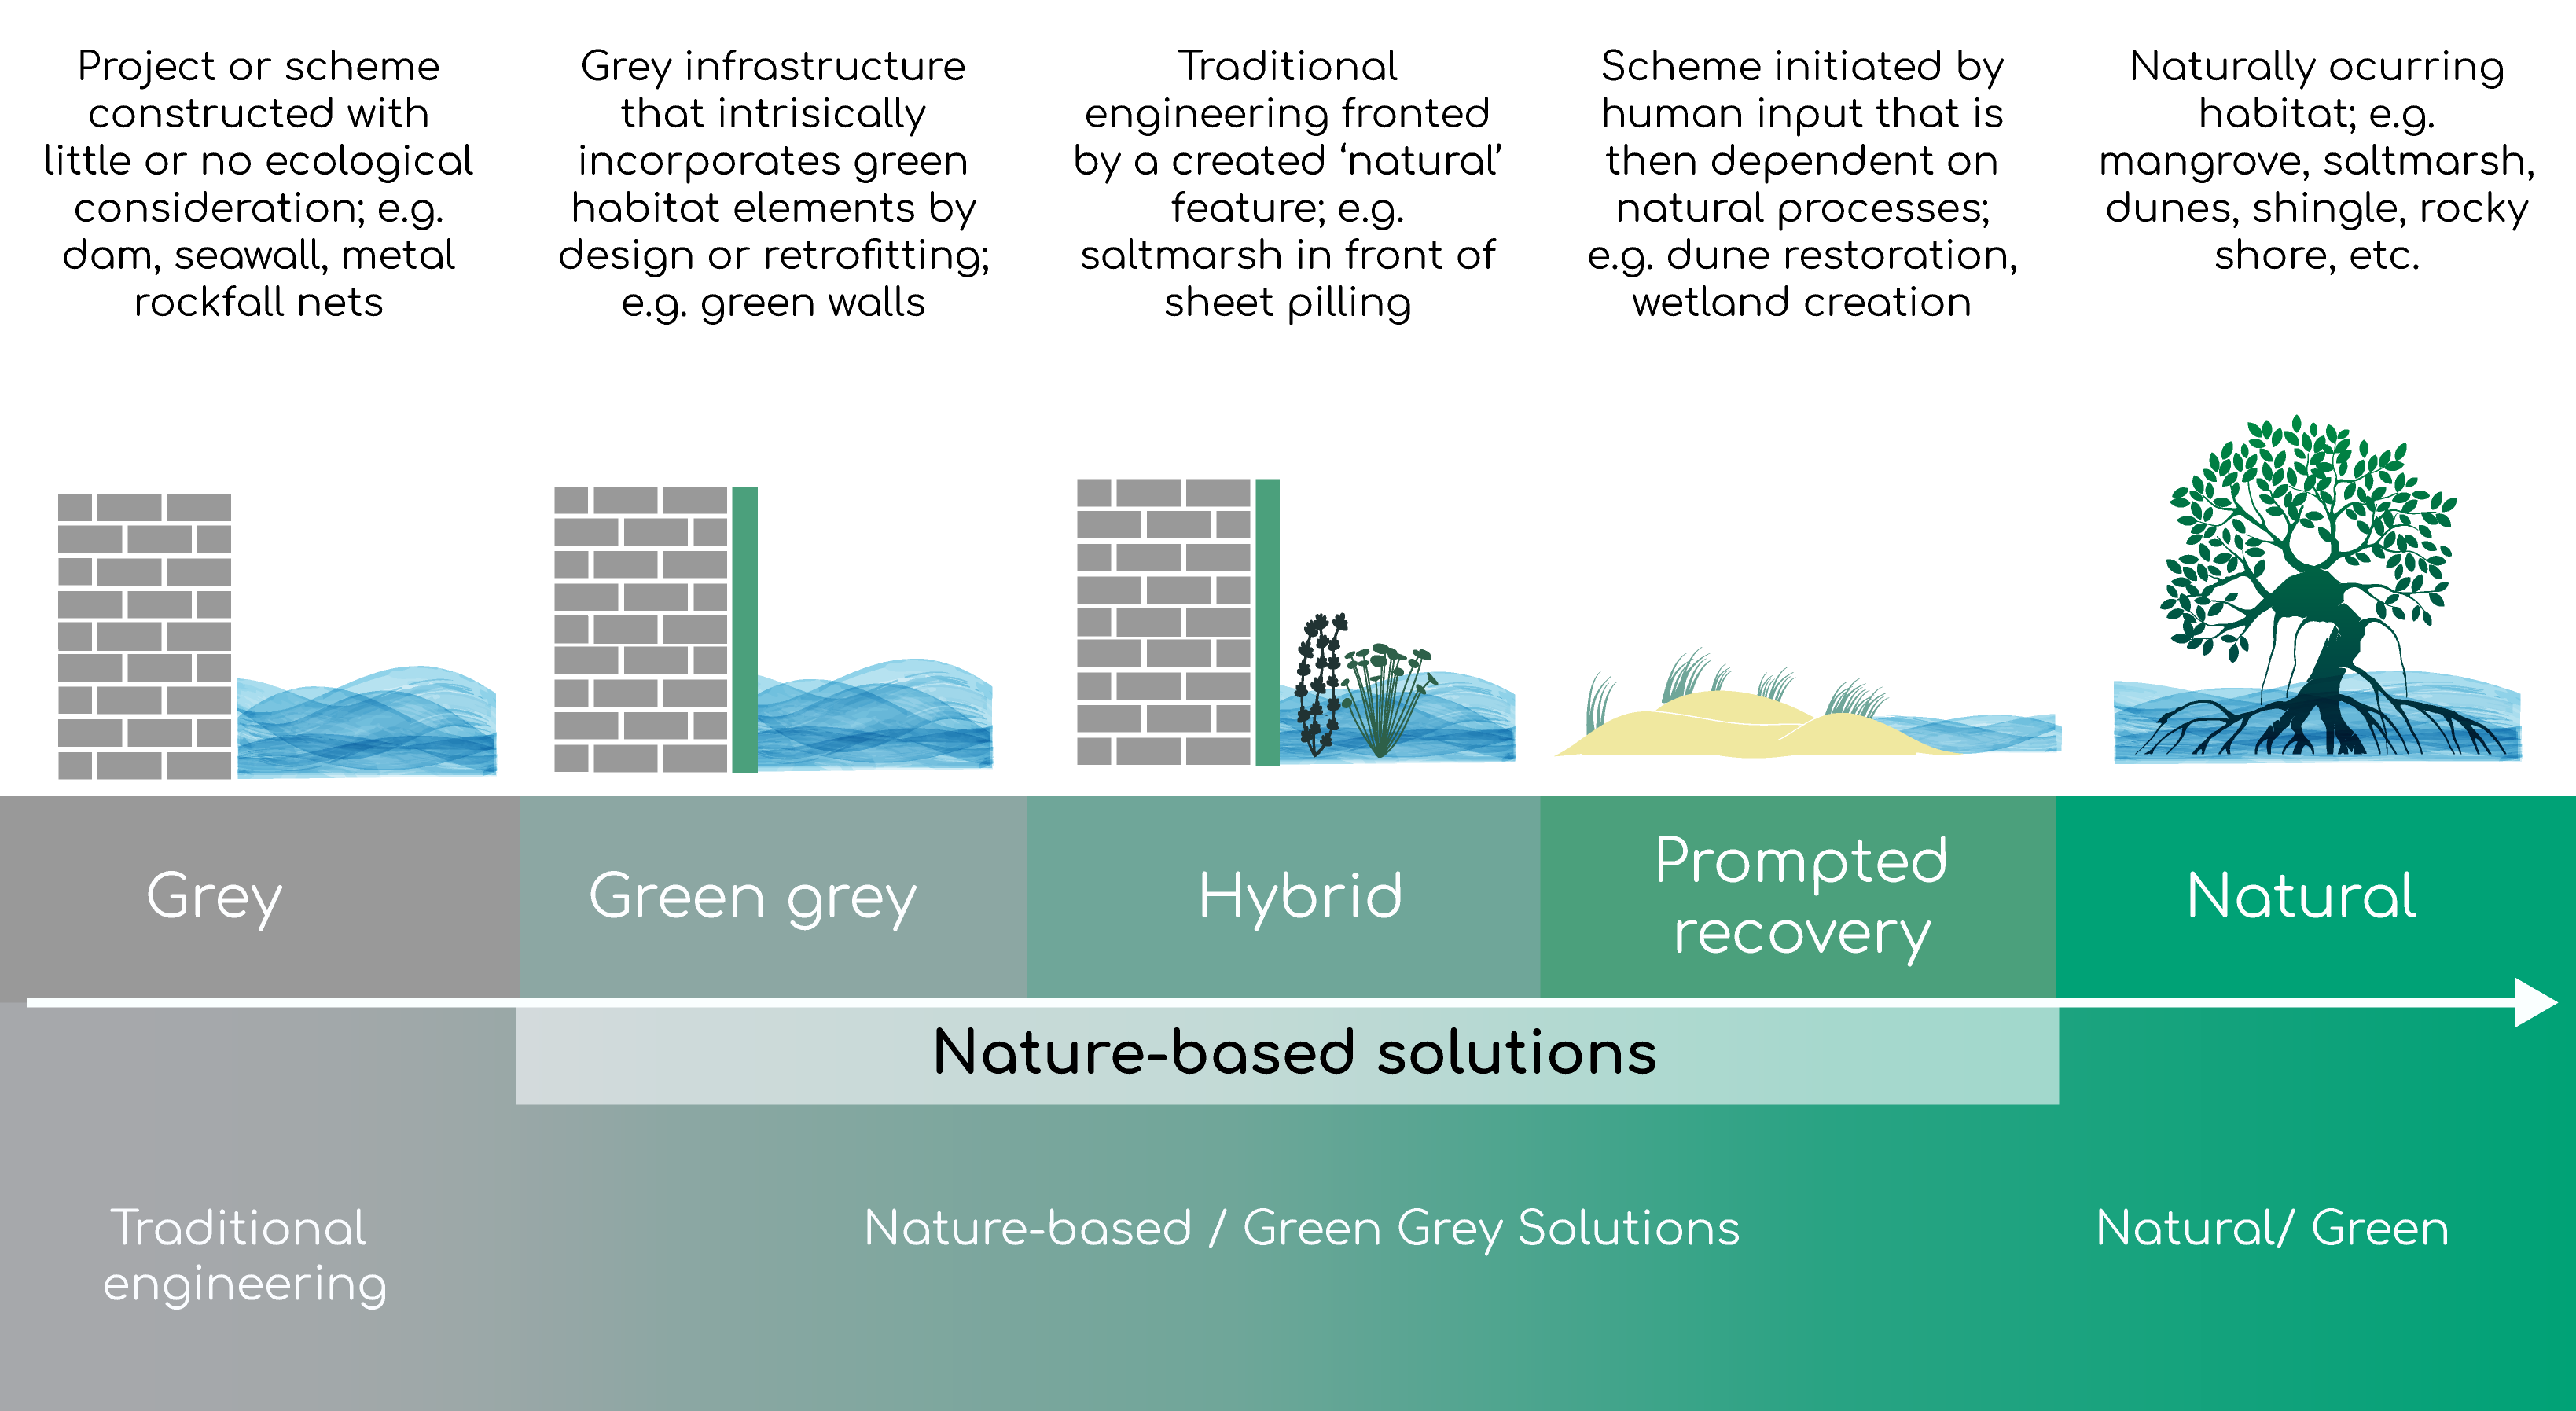

Supplement: s1 [file s1 › Supplementary Materials/Sustainability_figures/GreentoGrey-01.png]

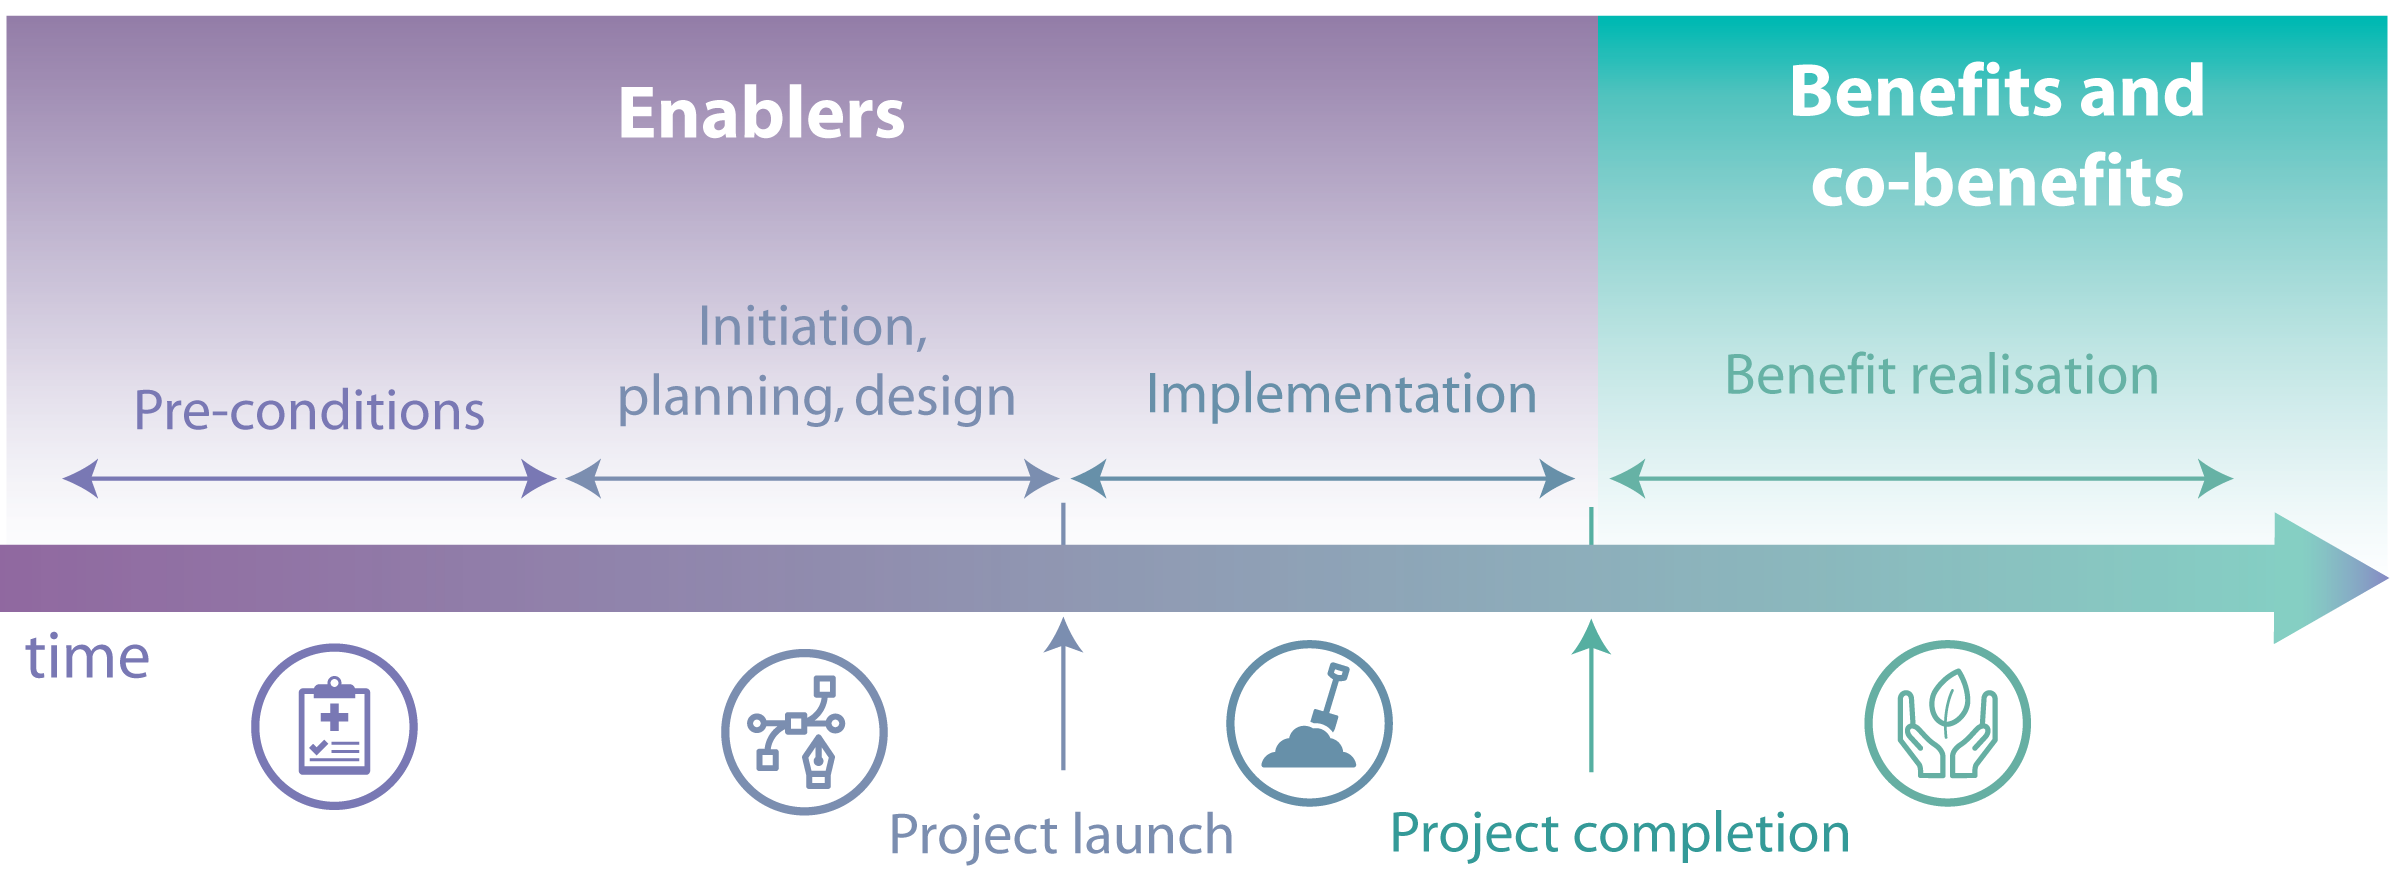

Supplement: s1 [file s1 › Supplementary Materials/Sustainability_figures/NBS_Lifecycle_White_Background-01.png]

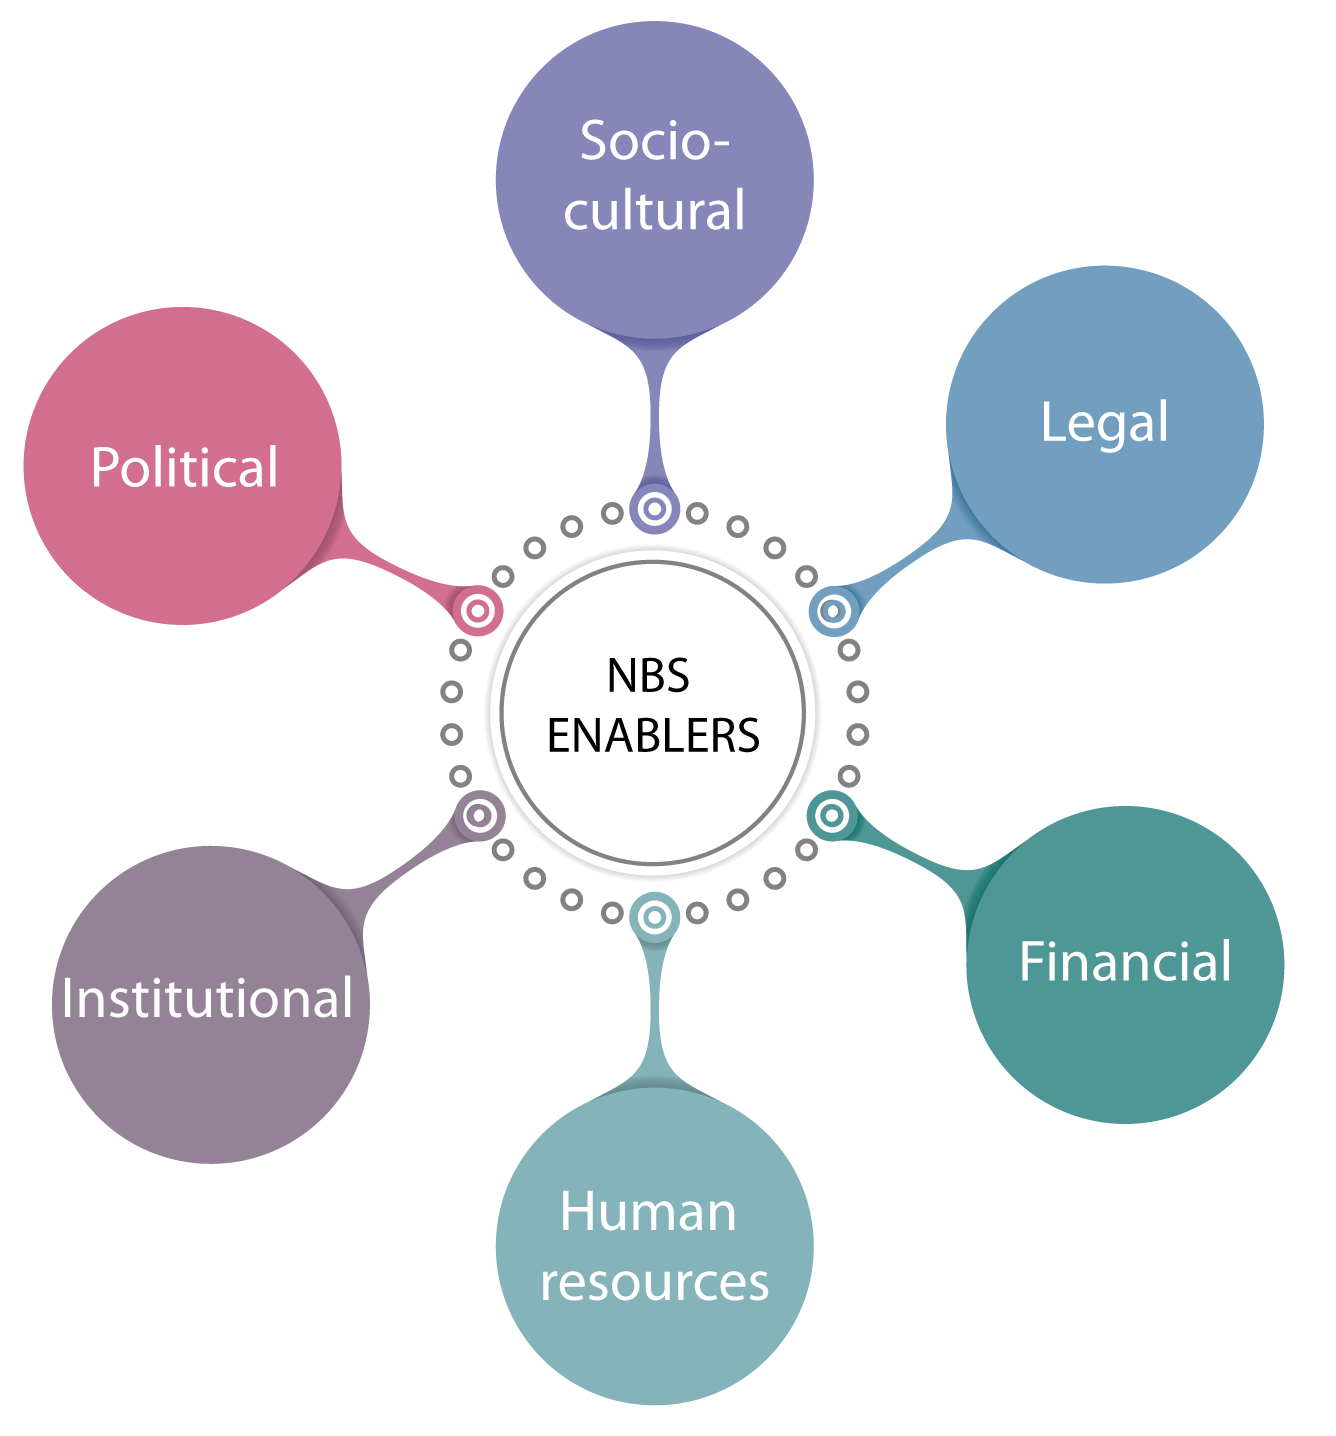

Supplement: s1 [file s1 › Supplementary Materials/Sustainability_figures/Typology_t1-01-01.png]
